# Supplementary material for: Heat Shock Protein 90 Inhibitors Reduce Trafficking of ATP-gated P2X1 Receptors and Human Platelet Responsiveness
Source: PubMed Central journal article supplement — J Biol Chem. 2012 Jul 31;287(39):32747–54. doi: 10.1074/jbc.M112.376566 (PMC3463321; doi:10.1074/jbc.m112.376566), 2012-07-31
Supplement: supp_M112.376566_jbc.M112.376566-6.pdf [file supp_M112.376566_jbc.M112.376566-6.pdf]

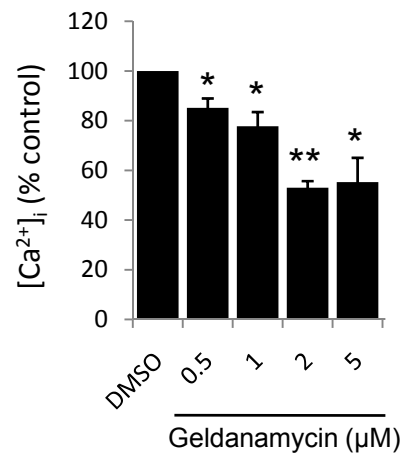

**Supplementary Figure 1.** Concentration dependence of inhibition of platelet P2X1 receptor mediated calcium rises (1 $\mu M$   $\alpha\beta$ -meATP) by geldanamycin.
